# Supplementary material for: Life-Cycle Assessment of Power-to-Liquid Kerosene Produced from Renewable Electricity and CO2 from Direct Air Capture in Germany
Source: MDPI journal article supplement (doi:10.3390/su141710658), 2022-08-26
Supplement: s1 [file s1]

Archive with 2 entries (2 files):
- sustainability-1826586_supplementary.pdf
- sustainability-1826586_supplementary_LCIA-results.xlsx
