# Supplementary material for: Life-Cycle Assessment of Power-to-Liquid Kerosene Produced from Renewable Electricity and CO2 from Direct Air Capture in Germany
Source: MDPI journal article supplement (doi:10.3390/su141710658), 2022-08-26
Supplement: s1 [file s1 › sustainability-1826586_supplementary_LCIA-results.xlsx]

## Sheet: Content & Abbreviations
	Life-cycle assessment of Power-to-Liquid Kerosene produced from renewable electricity and CO2 from Direct Air Capture in Germany
	Matteo Micheli1,*, Daniel Moore1,*, Vanessa Bach1 and Matthias Finkbeiner1
	1 Department of Sustainable Engineering, Institute of Environmental Technology, Technische Universität Berlin, Straße des 17. Juni 135, 10623 Berlin
	* Correspondence: matteo.micheli@gmail.com (M.M); daniel.lochner@tu-berlin.de (D.M.)
	This Excel file provides additional LCIA results for different electricity sources and layout variations
	Content of the spreadsheets:
	0. Fossil Jet A-1			Absolute LCIA results for fossil Jet A-1
	1. Electricity mix Variation			Absoulte LCIA results for electricity mix variation
	1.1. Electricity Charts			Charts for electricity mix variation
	2. Layout Variation for wind power			Absoulte LCIA results for wind power layout variation
	2.1. Layouts wind power charts			Charts for wind power layout variation
	2. Layout Variation for PV			Absoulte LCIA results for PV layout variation
	2.1. Layouts PV charts			Charts for wind PV variation
	Used Abbreviations
	AP	Acidification Potential
	DAC	Direct Ait Capture
	EOL	End of Life
	EP	Eutrophicaton Potetial
	eq.	equivalents
	GWP	Global Warming Potential
	NG	Natural Gas
	PEM	Protone Exchange Membrane
	POCP	Photochemical Ozone Creation Potential
	PtL	Power to liquid
	PV	Photovoltaic
	RFI	Radiative Forcing Index
	SOEC	Solid Oxide Electrolyzer Cell
	TTW	Tank-to-Wheel
	WTT	Well-to-Tank

## Sheet: 0. Fossil Jet A-1
	Fossil Jet A-1
	Impact Category	GWP-100+RFI	GWP-100	AP	EP	POCP	Non-renewable primary energy	Land transformation	Water consumption
	Unit	kgCO2eq/MJ	kgCO2eq/MJ	kgSO2eq/MJ	kg PO4 eq/MJ	kg_C2H4eq/MJ	MJ/MJ	m2/MJ	l/MJ_PtL
	Total	0.162779	0.0834676	0.000225727	4.63619e-05	2.39089e-05	1.18059	0.000736667	0.0123204
	WTT
	Jet A-1 production	0.00914898	0.00914898	3.80408e-05	2.4262e-06	7.93551e-06	0.182771	0.000736667	0.0123204
	TTW
	Jet A-1 combustion	0.15363	0.0743186	0.000187686	4.39357e-05	1.59734e-05	0.997356	0	0
	Impact Category	Non-renewable primary energy	Land transformation	Water consumption
	Unit	MJ/MJ	m2/MJ	l/MJ_PtL
	Total	1.18059	0.000736667	0.0123204
	WTT
	Jet A-1 production	0.182771	0.000736667	0.0123204
	TTW
	Jet A-1 combustion	0.997356	0	0

## Sheet: 1. Electricity mix Variation
	PtL plant type: HTFT at η=80%, Eletrolysis: SOEC, DAC plant type: low-temperature, elecricity mix: grid mix
	Impact Category	GWP-100+RFI	GWP-100	AP	EP	POCP		Impact Category	Non-renewable primary energy		Impact Category	Land transformation
	Unit	kgCO2eq/MJ_PtL	kgCO2eq/MJ_PtL	kgSO2eq/MJ_PtL	kg PO4 eq/MJ_PtL	kg_C2H4eq/MJ_PtL		Unit	MJ/MJ_PtL		Unit	m2/MJ_PtL
	Total	0.30583	0.227461	0.00051558	9.11401e-05	4.04335e-05		Total	2.93006		Total	0.0219122
	WTT							Operation			Direct: ptl plant infrastructure	2.41875e-07
	Operation							PtL+DAC plant operation (electricity)	2.89122		Direct: DAC plant infrastructure	3.75e-07
	PtL plant operation (electricity)	0.210069	0.210069	0.000302083	4.79167e-05	2.24653e-05		DAC plant operation (NG)	0		Direct: power plants infrastructure	0.00544908
	DAC plant operation (electricity)	0.0136125	0.0136125	1.9575e-05	3.105e-06	1.45575e-06		Construction			Indirect: power plants production and EOL	0.0164625
	DAC plant operation (NG)	0	0	0	0	0		PtL+DAC plant construction and EOL	0.038835
	CO2 captured	-0.075	-0.075								Impact Category	Water consumption
	CO2 losses	0.00375	0.00375								Unit	l/MJ_PtL
	Construction + EOL										Total	4.11491
	PtL+DAC plant construction and EOL	0.0036	0.0036	1.54903e-05	1.1e-06	9.375e-07					Direct (fuel production)	0.0564149
	TTW										Indirect (energy sources)	4.13349
	PtL combustion	0.149798	0.0714286	0.000178431	3.90184e-05	1.55749e-05					Extraction from air at low-temperature DAC plant	-0.075
	PtL plant type: HTFT at η=80%, Eletrolysis: SOEC, DAC plant type: low-temperature, elecricity mix: wind power
	Impact Category	GWP-100+RFI	GWP-100	AP	EP	POCP		Impact Category	Non-renewable primary energy		Impact Category	Land transformation
	Unit	kgCO2eq/MJ_PtL	kgCO2eq/MJ_PtL	kgSO2eq/MJ_PtL	kg PO4 eq/MJ_PtL	kg_C2H4eq/MJ_PtL		Unit	MJ/MJ_PtL		Unit	m2/MJ_PtL
	Total	0.0877175	0.00934785	0.000218674	4.29804e-05	1.95291e-05		Total	0.0465701		Total	0.000220329
	WTT							Operation			Direct: ptl plant infrastructure	2.41875e-07
	Operation							PtL+DAC plant operation (electricity)	0.00773511		Direct: DAC plant infrastructure	3.75e-07
	PtL plant operation (electricity)	0.00523035	0.00523035	2.3246e-05	2.68782e-06	2.83311e-06		DAC plant operation (NG)	0		Direct: power plants infrastructure	7.36427e-05
	DAC plant operation (electricity)	0.000338927	0.000338927	1.50634e-06	1.74171e-07	1.83585e-07		Construction			Indirect: power plants production and EOL	0.00014607
	DAC plant operation (NG)	0	0	0	0	0		PtL+DAC plant construction and EOL	0.038835
	CO2 captured	-0.075	-0.075								Impact Category	Water consumption
	CO2 losses	0.00375	0.00375								Unit	l/MJ_PtL
	Construction + EOL										Total	0.00618631
	PtL+DAC plant construction and EOL	0.0036	0.0036	1.54903e-05	1.1e-06	9.375e-07					Direct (fuel production)	0.0564149
	TTW										Indirect (energy sources)	0.0247714
	PtL combustion	0.149798	0.0714286	0.000178431	3.90184e-05	1.55749e-05					Extraction from air at low-temperature DAC plant	-0.075
	PtL plant type: HTFT at η=80%, Eletrolysis: SOEC, DAC plant type: low-temperature, elecricity mix: PV
	Impact Category	GWP-100+RFI	GWP-100	AP	EP	POCP		Impact Category	Non-renewable primary energy		Impact Category	Land transformation
	Unit	kgCO2eq/MJ_PtL	kgCO2eq/MJ_PtL	kgSO2eq/MJ_PtL	kg PO4 eq/MJ_PtL	kg_C2H4eq/MJ_PtL		Unit	MJ/MJ_PtL		Unit	m2/MJ_PtL
	Total	0.106977	0.0286078	0.000402487	6.04784e-05	2.94236e-05		Total	0.260703		Total	0.00332722
	WTT							Operation			Direct: ptl plant infrastructure	2.41875e-07
	Operation							PtL+DAC plant operation (electricity)	0.221868		Direct: DAC plant infrastructure	3.75e-07
	PtL plant operation (electricity)	0.0233182	0.0233182	0.000195873	1.91209e-05	1.21255e-05		DAC plant operation (NG)	0		Direct: power plants infrastructure	0.00104538
	DAC plant operation (electricity)	0.00151102	0.00151102	1.26926e-05	1.23904e-06	7.8573e-07		Construction			Indirect: power plants production and EOL	0.00228122
	DAC plant operation (NG)	0	0	0	0	0		PtL+DAC plant construction and EOL	0.038835
	CO2 captured	-0.075	-0.075								Impact Category	Water consumption
	CO2 losses	0.00375	0.00375								Unit	l/MJ_PtL
	Construction + EOL										Total	-0.0185851
	PtL+DAC plant construction and EOL	0.0036	0.0036	1.54903e-05	1.1e-06	9.375e-07					Direct (fuel production)	0.0564149
	TTW										Indirect (energy sources)	0
	PtL combustion	0.149798	0.0714286	0.000178431	3.90184e-05	1.55749e-05					Extraction from air at low-temperature DAC plant	-0.075

## Sheet: 1.1. Electricity Charts
	GWP+RFI & GWP: PtL plant type: HTFT at η=80%, Eletrolysis: SOEC, DAC plant type: low-temperature
	Electricity Source & Impact Category	grid mix GWP-100	wind power GWP-100	PV GWP-100	grid mix GWP-100+RFI	wind power GWP-100+RFI	PV GWP-100+RFI
	Unit	kgCO2eq/MJ_PtL	kgCO2eq/MJ_PtL	kgCO2eq/MJ_PtL	kgCO2eq/MJ_PtL	kgCO2eq/MJ_PtL	kgCO2eq/MJ_PtL
	Jet A-1	0.0834676	0.0834676	0.0834676	0.162779	0.162779	0.162779
	Difference [%]	1.72514	-0.888006	-0.657259	0.878803	-0.461126	-0.342807
	Total PtL	0.227461	0.00934785	0.0286078	0.30583	0.0877175	0.106977
	WTT
	Operation
	PtL plant operation (electricity)	0.210069	0.00523035	0.0233182	0.210069	0.00523035	0.0233182
	DAC plant operation (electricity)	0.0136125	0.000338927	0.00151102	0.0136125	0.000338927	0.00151102
	DAC plant operation (NG)	0	0	0	0	0	0
	CO2 captured	-0.075	-0.075	-0.075	-0.075	-0.075	-0.075
	CO2 losses	0.00375	0.00375	0.00375	0.00375	0.00375	0.00375
	Construction + EOL
	PtL+DAC plant construction and EOL	0.0036	0.0036	0.0036	0.0036	0.0036	0.0036
	TTW
	PtL combustion	0.0714286	0.0714286	0.0714286	0.149798	0.149798	0.149798
	AP - PtL plant type: HTFT at η=80%, Eletrolysis: SOEC, DAC plant type: low-temperature
		grid mix	wind power	PV
	Electricity Source	grid mix	wind power	PV
	Unit	kgSO2eq/MJ_PtL	kgSO2eq/MJ_PtL	kgSO2eq/MJ_PtL
	Total	0.00051558	0.000218674	0.000402487
	WTT
	Operation
	PtL plant operation (electricity)	0.000302083	2.3246e-05	0.000195873
	DAC plant operation (electricity)	1.9575e-05	1.50634e-06	1.26926e-05
	DAC plant operation (NG)	0	0	0
	CO2 captured
	CO2 losses
	Construction + EOL
	PtL+DAC plant construction and EOL	1.54903e-05	1.54903e-05	1.54903e-05
	TTW
	PtL combustion	0.000178431	0.000178431	0.000178431
	EP - PtL plant type: HTFT at η=80%, Eletrolysis: SOEC, DAC plant type: low-temperature
		grid mix	wind power	PV
	Electricity Source	grid mix	wind power	PV
	Unit	kg PO4 eq/MJ_PtL	kg PO4 eq/MJ_PtL	kg PO4 eq/MJ_PtL
	Total	9.11401e-05	4.29804e-05	6.04784e-05
	WTT
	Operation
	PtL plant operation (electricity)	4.79167e-05	2.68782e-06	1.91209e-05
	DAC plant operation (electricity)	3.105e-06	1.74171e-07	1.23904e-06
	DAC plant operation (NG)	0	0	0
	CO2 captured
	CO2 losses
	Construction + EOL
	PtL+DAC plant construction and EOL	1.1e-06	1.1e-06	1.1e-06
	TTW
	PtL combustion	3.90184e-05	3.90184e-05	3.90184e-05
	POCP - PtL plant type: HTFT at η=80%, Eletrolysis: SOEC, DAC plant type: low-temperature
		grid mix	wind power	PV
	Electricity Source	grid mix	wind power	PV
	Unit	kg_C2H4eq/MJ_PtL	kg_C2H4eq/MJ_PtL	kg_C2H4eq/MJ_PtL
	Total	4.04335e-05	1.95291e-05	2.94236e-05
	WTT
	Operation
	PtL plant operation (electricity)	2.24653e-05	2.83311e-06	1.21255e-05
	DAC plant operation (electricity)	1.45575e-06	1.83585e-07	7.8573e-07
	DAC plant operation (NG)	0	0	0
	CO2 captured
	CO2 losses
	Construction + EOL
	PtL+DAC plant construction and EOL	9.375e-07	9.375e-07	9.375e-07
	TTW
	PtL combustion	1.55749e-05	1.55749e-05	1.55749e-05
	Non-renewable primary energy - PtL plant type: HTFT at η=80%, Eletrolysis: SOEC, DAC plant type: low-temperature
		grid mix	wind power	PV
	Electricity Source	grid mix	wind power	PV
	Unit	MJ/MJ_PtL	MJ/MJ_PtL	MJ/MJ_PtL
	Total	2.93006	0.0465701	0.260703
	Operation
	PtL+DAC plant operation (electricity)	2.89122	0.00773511	0.221868
	DAC plant operation (NG)	0	0	0
	Construction
	PtL+DAC plant construction and EOL	0.038835	0.038835	0.038835
	Land transformation - PtL plant type: HTFT at η=80%, Eletrolysis: SOEC, DAC plant type: low-temperature
		grid mix	wind power	PV
	Electricity Source	grid mix	wind power	PV
	Unit	m2/MJ_PtL	m2/MJ_PtL	m2/MJ_PtL
	Total	0.0219122	0.000220329	0.00332722
	Direct: ptl plant infrastructure	2.41875e-07	2.41875e-07	2.41875e-07
	Direct: DAC plant infrastructure	3.75e-07	3.75e-07	3.75e-07
	Direct: power plants infrastructure	0.00544908	7.36427e-05	0.00104538
	Indirect: power plants production and EOL	0.0164625	0.00014607	0.00228122
	Water consumption - PtL plant type: HTFT at η=80%, Eletrolysis: SOEC, DAC plant type: low-temperature
		grid mix	wind power	PV
	Electricity Source	grid mix	wind power	PV
	Unit	l/MJ_PtL	m2/MJ_PtL	m2/MJ_PtL
	Total	4.11491	0.00618631	-0.0185851
	Direct (fuel production)	0.0564149	0.0564149	0.0564149
	Indirect (energy sources)	4.13349	0.0247714	0
	Extraction from air at low-temperature DAC plant	-0.075	-0.075	-0.075

## Sheet: 2. Layout Variation for wind
	Elecricity source: wind power
	PtL plant type: HTFT at η=80%, Eletrolysis: SOEC, DAC plant type: low-temperature, elecricity mix: wind power
	Impact Category	GWP-100+RFI	GWP-100	AP	EP	POCP		Impact Category	Non-renewable primary energy		Impact Category	Land transformation
	Unit	kgCO2eq/MJ_PtL	kgCO2eq/MJ_PtL	kgSO2eq/MJ_PtL	kg PO4 eq/MJ_PtL	kg_C2H4eq/MJ_PtL		Unit	MJ/MJ_PtL		Unit	m2/MJ_PtL
	Jet A-1	0.162779	0.0834676	0.000225727	4.63619e-05	2.39089e-05		Jet A-1	1.18059		Jet A-1	0.000736667
	Difference [%]	-0.461126	-0.888006	-0.031248	-0.0729353	-0.183185		Difference [%]	-0.960554		Difference [%]	-0.700911
	Total PtL	0.0877175	0.00934785	0.000218674	4.29804e-05	1.95291e-05		Total PtL	0.0465701		Total PtL	0.000220329
	WTT							Operation			Direct: ptl plant infrastructure	2.41875e-07
	Operation							PtL+DAC plant operation (electricity)	0.00773511		Direct: DAC plant infrastructure	3.75e-07
	PtL plant operation (electricity)	0.00523035	0.00523035	2.3246e-05	2.68782e-06	2.83311e-06		DAC plant operation (NG)	0		Direct: power plants infrastructure	7.36427e-05
	DAC plant operation (electricity)	0.000338927	0.000338927	1.50634e-06	1.74171e-07	1.83585e-07		Construction			Indirect: power plants production and EOL	0.00014607
	DAC plant operation (NG)	0	0	0	0	0		PtL+DAC plant construction and EOL	0.038835
	CO2 captured	-0.075	-0.075								Impact Category	Water consumption
	CO2 losses	0.00375	0.00375								Unit	l/MJ_PtL
	Construction + EOL										Jet A-1	0.0123204
	PtL+DAC plant construction and EOL	0.0036	0.0036	1.54903e-05	1.1e-06	9.375e-07					Difference [%]	-0.49788
	TTW										Total PtL	0.00618631
	PtL combustion	0.149798	0.0714286	0.000178431	3.90184e-05	1.55749e-05					Direct (fuel production)	0.0564149
											Indirect (energy sources)	0.0247714
											Extraction from air	-0.075
	PtL plant type: HTFT at η=80%, Eletrolysis: SOEC, DAC plant type: high-temperature, elecricity mix: wind power
	Impact Category	GWP-100+RFI	GWP-100	AP	EP	POCP		Impact Category	Non-renewable primary energy		Impact Category	Land transformation
	Unit	kgCO2eq/MJ_PtL	kgCO2eq/MJ_PtL	kgSO2eq/MJ_PtL	kg PO4 eq/MJ_PtL	kg_C2H4eq/MJ_PtL		Unit	MJ/MJ_PtL		Unit	m2/MJ_PtL
	Jet A-1	0.162779	0.0834676	0.000225727	4.63619e-05	2.39089e-05		Jet A-1	1.18059		Jet A-1	0.000736667
	Difference [%]	-0.294076	-0.562223	0.0600588	-0.0113703	0.26974		Difference [%]	-0.345307		Difference [%]	-0.673308
	Total	0.11491	0.0365402	0.000239284	4.58347e-05	3.03581e-05		Total	0.772924		Total	0.000240663
	WTT							Operation			Direct: ptl plant infrastructure	2.41875e-07
	Operation							PtL+DAC plant operation (electricity)	0.00726438		Direct: DAC plant infrastructure	3.75e-07
	PtL plant operation (electricity)	0.00523035	0.00523035	2.3246e-05	2.68782e-06	2.83311e-06		DAC plant operation (NG)	0.726825		Direct: power plants infrastructure	6.02718e-05
	DAC plant operation (electricity)	0	0	0	0	0		Construction			Indirect: power plants production and EOL	0.000179774
	DAC plant operation (NG)	0.0275313	0.0275313	2.21168e-05	3.02844e-06	1.10125e-05		PtL+DAC plant construction and EOL	0.038835
	CO2 captured	-0.075	-0.075								Impact Category	Water consumption
	CO2 losses	0.00375	0.00375								Unit	l/MJ_PtL
	Construction + EOL										Jet A-1	0.0123204
	PtL+DAC plant construction and EOL	0.0036	0.0036	1.54903e-05	1.1e-06	9.375e-07					Reduction [%]	5.46723
	TTW										Total	0.0796788
	PtL combustion	0.149798	0.0714286	0.000178431	3.90184e-05	1.55749e-05					Direct (fuel production)	0.0564149
											Indirect (energy sources)	0.0232639
											Extraction from air	0
	PtL plant type: LTFT at η=50.9%, Eletrolysis: PEM, DAC plant type: low-temperature, elecricity mix: wind power
	Impact Category	GWP-100+RFI	GWP-100	AP	EP	POCP		Impact Category	Non-renewable primary energy		Impact Category	Land transformation
	Unit	kgCO2eq/MJ_PtL	kgCO2eq/MJ_PtL	kgSO2eq/MJ_PtL	kg PO4 eq/MJ_PtL	kg_C2H4eq/MJ_PtL		Unit	MJ/MJ_PtL		Unit	m2/MJ_PtL
	Jet A-1	0.162779	0.0834676	0.000225727	4.63619e-05	2.39089e-05		Jet A-1	1.18059		Jet A-1	0.000736667
	Difference [%]	-0.436263	-0.839519	0.0484374	-0.0280759	-0.0914957		Difference [%]	-0.955792		Difference [%]	-0.484176
	Total	0.0917646	0.013395	0.000236661	4.50602e-05	2.17213e-05		Total	0.052191		Total	0.000379991
	WTT							Operation			Direct: ptl plant infrastructure	2.41875e-07
	Operation							PtL+DAC plant operation (electricity)	0.0133561		Direct: DAC plant infrastructure	3.75e-07
	PtL plant operation (electricity)	0.00821465	0.00821465	3.65096e-05	4.22142e-06	4.4496e-06		DAC plant operation (NG)	0		Direct: power plants infrastructure	0.000233304
	DAC plant operation (electricity)	0.00140173	0.00140173	6.22993e-06	7.20336e-07	7.59273e-07		Construction			Indirect: power plants production and EOL	0.00014607
	DAC plant operation (NG)	0	0	0	0	0		PtL+DAC plant construction and EOL	0.038835
	CO2 captured	-0.075	-0.075								Impact Category	Water consumption
	CO2 losses	0.00375	0.00375								Unit	l/MJ_PtL
	Construction + EOL										Jet A-1	0.0123204
	PtL+DAC plant construction and EOL	0.0036	0.0036	1.54903e-05	1.1e-06	9.375e-07					Difference [%]	8.15051
	TTW										Total	0.112738
	PtL combustion	0.149798	0.0714286	0.000178431	3.90184e-05	1.55749e-05					Direct (fuel production)	0.144965
											Indirect (energy sources)	0.0427724
											Extraction from air	-0.075
	PtL plant type: LTFT at η=50.9%, Eletrolysis: PEM, DAC plant type: high-temperature, elecricity mix: wind power
	Impact Category	GWP-100+RFI	GWP-100	AP	EP	POCP		Impact Category	Non-renewable primary energy		Impact Category	Land transformation
	Unit	kgCO2eq/MJ_PtL	kgCO2eq/MJ_PtL	kgSO2eq/MJ_PtL	kg PO4 eq/MJ_PtL	kg_C2H4eq/MJ_PtL		Unit	MJ/MJ_PtL		Unit	m2/MJ_PtL
	Jet A-1	0.162779	0.0834676	0.000225727	4.63619e-05	2.39089e-05		Jet A-1	1.18059		Jet A-1	0.000736667
	Difference [%]	-0.275742	-0.526469	0.118818	0.0217086	0.33735		Difference [%]	-0.341796		Difference [%]	-0.51349
	Total	0.117894	0.0395245	0.000252548	4.73683e-05	3.19745e-05		Total	0.777069		Total	0.000358396
	WTT							Operation			Direct: ptl plant infrastructure	2.41875e-07
	Operation							PtL+DAC plant operation (electricity)	0.0114092		Direct: DAC plant infrastructure	3.75e-07
	PtL plant operation (electricity)	0.00821465	0.00821465	3.65096e-05	4.22142e-06	4.4496e-06		DAC plant operation (NG)	0.726825		Direct: power plants infrastructure	0.000178005
	DAC plant operation (electricity)	0	0	0	0	0		Construction			Indirect: power plants production and EOL	0.000179774
	DAC plant operation (NG)	0.0275313	0.0275313	2.21168e-05	3.02844e-06	1.10125e-05		PtL+DAC plant construction and EOL	0.038835
	CO2 captured	-0.075	-0.075								Impact Category	Water consumption
	CO2 losses	0.00375	0.00375								Unit	l/MJ_PtL
	Construction + EOL										Jet A-1	0.0123204
	PtL+DAC plant construction and EOL	0.0036	0.0036	1.54903e-05	1.1e-06	9.375e-07					Difference [%]	13.7319
	TTW										Total	0.181503
	PtL combustion	0.149798	0.0714286	0.000178431	3.90184e-05	1.55749e-05					Direct (fuel production)	0.144965
											Indirect (energy sources)	0.0365376
											Extraction from air	0

## Sheet: 2.1. Layouts Wind Charts
	Elecricity source: wind power
	GWP & GWP+RFI
	Layout & Impact Category	HTFT, low-temp. DAC GWP-100	HTFT, high-temp. DAC GWP-100	LTFT, low-temp. DAC GWP-100	LTFT, high-temp. DAC GWP-100	HTFT, low-temp. DAC GWP-100+RFI	HTFT, high-temp. DAC GWP-100+RFI	LTFT, low-temp. DAC GWP-100+RFI	LTFT, high-temp. DAC GWP-100+RFI
	Unit	kgCO2eq/MJ_PtL	kgCO2eq/MJ_PtL	kgCO2eq/MJ_PtL	kgCO2eq/MJ_PtL	kgCO2eq/MJ_PtL	kgCO2eq/MJ_PtL	kgCO2eq/MJ_PtL	kgCO2eq/MJ_PtL
	Jet A-1	0.0834676	0.0834676	0.0834676	0.0834676	0.162779	0.162779	0.162779	0.162779
	Difference [%]	-0.888006	-0.562223	-0.839519	-0.526469	-0.461126	-0.294076	-0.436263	-0.275742
	Total	0.00934785	0.0365402	0.013395	0.0395245	0.0877175	0.11491	0.0917646	0.117894
	WTT
	Operation
	PtL plant operation (electricity)	0.00523035	0.00523035	0.00821465	0.00821465	0.00523035	0.00523035	0.00821465	0.00821465
	DAC plant operation (electricity)	0.000338927	0	0.00140173	0	0.000338927	0	0.00140173	0
	DAC plant operation (NG)	0	0.0275313	0	0.0275313	0	0.0275313	0	0.0275313
	CO2 captured	-0.075	-0.075	-0.075	-0.075	-0.075	-0.075	-0.075	-0.075
	CO2 losses	0.00375	0.00375	0.00375	0.00375	0.00375	0.00375	0.00375	0.00375
	Construction + EOL
	PtL+DAC plant construction and EOL	0.0036	0.0036	0.0036	0.0036	0.0036	0.0036	0.0036	0.0036
	TTW
	PtL combustion	0.0714286	0.0714286	0.0714286	0.0714286	0.149798	0.149798	0.149798	0.149798
	AP
	Layout	HTFT, low-temp. DAC	HTFT, high-temp. DAC	LTFT, low-temp. DAC	LTFT, high-temp. DAC
	Unit	kgSO2eq/MJ_PtL	kgSO2eq/MJ_PtL	kgSO2eq/MJ_PtL	kgSO2eq/MJ_PtL
	Jet A-1	0.000225727	0.000225727	0.000225727	0.000225727
	Difference [%]	-0.031248	0.0600588	0.0484374	0.118818
	Total	0.000218674	0.000239284	0.000236661	0.000252548
	WTT
	Operation
	PtL plant operation (electricity)	2.3246e-05	2.3246e-05	3.65096e-05	3.65096e-05
	DAC plant operation (electricity)	1.50634e-06	0	6.22993e-06	0
	DAC plant operation (NG)	0	2.21168e-05	0	2.21168e-05
	CO2 captured
	CO2 losses
	Construction + EOL
	PtL+DAC plant construction and EOL	1.54903e-05	1.54903e-05	1.54903e-05	1.54903e-05
	TTW
	PtL combustion	0.000178431	0.000178431	0.000178431	0.000178431
	EP
	Layout	HTFT, low-temp. DAC	HTFT, high-temp. DAC	LTFT, low-temp. DAC	LTFT, high-temp. DAC
	Unit	kg PO4 eq/MJ_PtL	kg PO4 eq/MJ_PtL	kg PO4 eq/MJ_PtL	kg PO4 eq/MJ_PtL
	Jet A-1	4.63619e-05	4.63619e-05	4.63619e-05	4.63619e-05
	Difference [%]	-0.0729353	-0.0113703	-0.0280759	0.0217086
	Total	4.29804e-05	4.58347e-05	4.50602e-05	4.73683e-05
	WTT
	Operation
	PtL plant operation (electricity)	2.68782e-06	2.68782e-06	4.22142e-06	4.22142e-06
	DAC plant operation (electricity)	1.74171e-07	0	7.20336e-07	0
	DAC plant operation (NG)	0	3.02844e-06	0	3.02844e-06
	CO2 captured
	CO2 losses
	Construction + EOL
	PtL+DAC plant construction and EOL	1.1e-06	1.1e-06	1.1e-06	1.1e-06
	TTW
	PtL combustion	3.90184e-05	3.90184e-05	3.90184e-05	3.90184e-05
	POCP
	Layout	HTFT, low-temp. DAC	HTFT, high-temp. DAC	LTFT, low-temp. DAC	LTFT, high-temp. DAC
	Unit	kg_C2H4eq/MJ_PtL	kg_C2H4eq/MJ_PtL	kg_C2H4eq/MJ_PtL	kg_C2H4eq/MJ_PtL
	Jet A-1	2.39089e-05	2.39089e-05	2.39089e-05	2.39089e-05
	Difference [%]	-0.183185	0.26974	-0.0914957	0.33735
	Total	1.95291e-05	3.03581e-05	2.17213e-05	3.19745e-05
	WTT
	Operation
	PtL plant operation (electricity)	2.83311e-06	2.83311e-06	4.4496e-06	4.4496e-06
	DAC plant operation (electricity)	1.83585e-07	0	7.59273e-07	0
	DAC plant operation (NG)	0	1.10125e-05	0	1.10125e-05
	CO2 captured
	CO2 losses
	Construction + EOL
	PtL+DAC plant construction and EOL	9.375e-07	9.375e-07	9.375e-07	9.375e-07
	TTW
	PtL combustion	1.55749e-05	1.55749e-05	1.55749e-05	1.55749e-05
	Non-renewable primary energy
	Layout	HTFT, low-temp. DAC	HTFT, high-temp. DAC	LTFT, low-temp. DAC	LTFT, high-temp. DAC
	Unit	MJ/MJ_PtL	MJ/MJ_PtL	MJ/MJ_PtL	MJ/MJ_PtL
	Jet A-1	1.18059	1.18059	1.18059	1.18059
	Difference [%]	-0.960554	-0.345307	-0.955792	-0.341796
	Total	0.0465701	0.772924	0.052191	0.777069
	Operation
	PtL+DAC plant operation (electricity)	0.00773511	0.00726438	0.0133561	0.0114092
	DAC plant operation (NG)	0	0.726825	0	0.726825
	Construction
	PtL+DAC plant construction and EOL	0.038835	0.038835	0.038835	0.038835
	Land transformation
	Layout	HTFT, low-temp. DAC	HTFT, high-temp. DAC	LTFT, low-temp. DAC	LTFT, high-temp. DAC
	Unit	MJ/MJ_PtL	MJ/MJ_PtL	MJ/MJ_PtL	MJ/MJ_PtL
	Jet A-1	0.000736667	0.000736667	0.000736667	0.000736667
	Difference [%]	-0.700911	-0.673308	-0.484176	-0.51349
	Total	0.000220329	0.000240663	0.000379991	0.000358396
	Direct: ptl plant infrastructure	2.41875e-07	2.41875e-07	2.41875e-07	2.41875e-07
	Direct: DAC plant infrastructure	3.75e-07	3.75e-07	3.75e-07	3.75e-07
	Direct: power plants infrastructure	7.36427e-05	6.02718e-05	0.000233304	0.000178005
	Indirect: power plants production and EOL	0.00014607	0.000179774	0.00014607	0.000179774
	Water consumption
	Layout	HTFT, low-temp. DAC	HTFT, high-temp. DAC	LTFT, low-temp. DAC	LTFT, high-temp. DAC
	Unit	l/MJ_PtL	l/MJ_PtL	l/MJ_PtL	l/MJ_PtL
	Jet A-1	0.0123204	0.0123204	0.0123204	0.0123204
	Difference [%]	-0.49788	5.46723	8.15051	13.7319
	Total	0.00618631	0.0796788	0.112738	0.181503
	Direct (fuel production)	0.0564149	0.0564149	0.144965	0.144965
	Indirect (energy sources)	0.0247714	0.0232639	0.0427724	0.0365376
	Extraction from air (DAC)	-0.075	0	-0.075	0

## Sheet: 3. Layout Variation for PV
	Elecricity source: PV
	PtL plant type: HTFT at η=80%, Eletrolysis: SOEC, DAC plant type: low-temperature, elecricity mix: PV
	Impact Category	GWP-100+RFI	GWP-100	AP	EP	POCP		Impact Category	Non-renewable primary energy		Impact Category	Land transformation
	Unit	kgCO2eq/MJ_PtL	kgCO2eq/MJ_PtL	kgSO2eq/MJ_PtL	kg PO4 eq/MJ_PtL	kg_C2H4eq/MJ_PtL		Unit	MJ/MJ_PtL		Unit	m2/MJ_PtL
	Jet A-1	0.162779	0.0834676	0.000225727	4.63619e-05	2.39089e-05		Jet A-1	1.18059		Jet A-1	0.000736667
	Difference [%]	-0.342807	-0.657259	0.783067	0.304486	0.230657		Difference [%]	-0.779176		Difference [%]	3.51658
	Total PtL	0.106977	0.0286078	0.000402487	6.04784e-05	2.94236e-05		Total PtL	0.260703		Total PtL	0.00332722
	WTT							Operation			Direct: ptl plant infrastructure	2.41875e-07
	Operation							PtL+DAC plant operation (electricity)	0.221868		Direct: DAC plant infrastructure	3.75e-07
	PtL plant operation (electricity)	0.0233182	0.0233182	0.000195873	1.91209e-05	1.21255e-05		DAC plant operation (NG)	0		Direct: power plants infrastructure	0.00104538
	DAC plant operation (electricity)	0.00151102	0.00151102	1.26926e-05	1.23904e-06	7.8573e-07		Construction			Indirect: power plants production and EOL	0.00228122
	DAC plant operation (NG)	0	0	0	0	0		PtL+DAC plant construction and EOL	0.038835
	CO2 captured	-0.075	-0.075								Impact Category	Water consumption
	CO2 losses	0.00375	0.00375								Unit	l/MJ_PtL
	Construction + EOL										Jet A-1	0.0123204
	PtL+DAC plant construction and EOL	0.0036	0.0036	1.54903e-05	1.1e-06	9.375e-07					Difference [%]	-2.50848
	TTW										Total PtL	-0.0185851
	PtL combustion	0.149798	0.0714286	0.000178431	3.90184e-05	1.55749e-05					Direct (fuel production)	0.0564149
											Indirect (energy sources)	0
											Extraction from air	-0.075
	PtL plant type: HTFT at η=80%, Eletrolysis: SOEC, DAC plant type: high-temperature, elecricity mix: PV
	Impact Category	GWP-100+RFI	GWP-100	AP	EP	POCP		Impact Category	Non-renewable primary energy		Impact Category	Land transformation
	Unit	kgCO2eq/MJ_PtL	kgCO2eq/MJ_PtL	kgSO2eq/MJ_PtL	kg PO4 eq/MJ_PtL	kg_C2H4eq/MJ_PtL		Unit	MJ/MJ_PtL		Unit	m2/MJ_PtL
	Jet A-1	0.162779	0.0834676	0.000225727	4.63619e-05	2.39089e-05		Jet A-1	1.18059		Jet A-1	0.000736667
	Difference [%]	-0.182957	-0.345518	0.824818	0.343083	0.658396		Difference [%]	-0.174967		Difference [%]	3.28752
	Total	0.132998	0.054628	0.000411911	6.22678e-05	3.96504e-05		Total	0.974026		Total	0.00315848
	WTT							Operation			Direct: ptl plant infrastructure	2.41875e-07
	Operation							PtL+DAC plant operation (electricity)	0.208366		Direct: DAC plant infrastructure	3.75e-07
	PtL plant operation (electricity)	0.0233182	0.0233182	0.000195873	1.91209e-05	1.21255e-05		DAC plant operation (NG)	0.726825		Direct: power plants infrastructure	0.000842933
	DAC plant operation (electricity)	0	0	0	0	0		Construction			Indirect: power plants production and EOL	0.00231493
	DAC plant operation (NG)	0.0275313	0.0275313	2.21168e-05	3.02844e-06	1.10125e-05		PtL+DAC plant construction and EOL	0.038835
	CO2 captured	-0.075	-0.075								Impact Category	Water consumption
	CO2 losses	0.00375	0.00375								Unit	l/MJ_PtL
	Construction + EOL										Jet A-1	0.0123204
	PtL+DAC plant construction and EOL	0.0036	0.0036	1.54903e-05	1.1e-06	9.375e-07					Reduction [%]	3.57899
	TTW										Total	0.0564149
	PtL combustion	0.149798	0.0714286	0.000178431	3.90184e-05	1.55749e-05					Direct (fuel production)	0.0564149
											Indirect (energy sources)	0
											Extraction from air	0
	PtL plant type: LTFT at η=50.9%, Eletrolysis: PEM, DAC plant type: low-temperature, elecricity mix: PV
	Impact Category	GWP-100+RFI	GWP-100	AP	EP	POCP		Impact Category	Non-renewable primary energy		Impact Category	Land transformation
	Unit	kgCO2eq/MJ_PtL	kgCO2eq/MJ_PtL	kgSO2eq/MJ_PtL	kg PO4 eq/MJ_PtL	kg_C2H4eq/MJ_PtL		Unit	MJ/MJ_PtL		Unit	m2/MJ_PtL
	Jet A-1	0.162779	0.0834676	0.000225727	4.63619e-05	2.39089e-05		Jet A-1	1.18059		Jet A-1	0.000736667
	Difference [%]	-0.231963	-0.441091	1.4545	0.623612	0.623079		Difference [%]	-0.64261		Difference [%]	6.7981
	Total	0.12502	0.0466508	0.000554048	7.52737e-05	3.8806e-05		Total	0.421932		Total	0.0057446
	WTT							Operation			Direct: ptl plant infrastructure	2.41875e-07
	Operation							PtL+DAC plant operation (electricity)	0.383097		Direct: DAC plant infrastructure	3.75e-07
	PtL plant operation (electricity)	0.0366229	0.0366229	0.000307633	3.00308e-05	1.90439e-05		DAC plant operation (NG)	0		Direct: power plants infrastructure	0.00346277
	DAC plant operation (electricity)	0.00624928	0.00624928	5.24939e-05	5.12441e-06	3.24962e-06		Construction			Indirect: power plants production and EOL	0.00228122
	DAC plant operation (NG)	0	0	0	0	0		PtL+DAC plant construction and EOL	0.038835
	CO2 captured	-0.075	-0.075								Impact Category	Water consumption
	CO2 losses	0.00375	0.00375								Unit	l/MJ_PtL
	Construction + EOL										Jet A-1	0.0123204
	PtL+DAC plant construction and EOL	0.0036	0.0036	1.54903e-05	1.1e-06	9.375e-07					Difference [%]	4.67883
	TTW										Total	0.0699654
	PtL combustion	0.149798	0.0714286	0.000178431	3.90184e-05	1.55749e-05					Direct (fuel production)	0.144965
											Indirect (energy sources)	0
											Extraction from air	-0.075
	PtL plant type: LTFT at η=50.9%, Eletrolysis: PEM, DAC plant type: high-temperature, elecricity mix: PV
	Impact Category	GWP-100+RFI	GWP-100	AP	EP	POCP		Impact Category	Non-renewable primary energy		Impact Category	Land transformation
	Unit	kgCO2eq/MJ_PtL	kgCO2eq/MJ_PtL	kgSO2eq/MJ_PtL	kg PO4 eq/MJ_PtL	kg_C2H4eq/MJ_PtL		Unit	MJ/MJ_PtL		Unit	m2/MJ_PtL
	Jet A-1	0.162779	0.0834676	0.000225727	4.63619e-05	2.39089e-05		Jet A-1	1.18059		Jet A-1	0.000736667
	Difference [%]	-0.101222	-0.186118	1.31993	0.578403	0.947765		Difference [%]	-0.0742649		Difference [%]	5.70729
	Total	0.146302	0.0679328	0.000523671	7.31777e-05	4.65689e-05		Total	1.09291		Total	0.00494104
	WTT							Operation			Direct: ptl plant infrastructure	2.41875e-07
	Operation							PtL+DAC plant operation (electricity)	0.327255		Direct: DAC plant infrastructure	3.75e-07
	PtL plant operation (electricity)	0.0366229	0.0366229	0.000307633	3.00308e-05	1.90439e-05		DAC plant operation (NG)	0.726825		Direct: power plants infrastructure	0.00262549
	DAC plant operation (electricity)	0	0	0	0	0		Construction			Indirect: power plants production and EOL	0.00231493
	DAC plant operation (NG)	0.0275313	0.0275313	2.21168e-05	3.02844e-06	1.10125e-05		PtL+DAC plant construction and EOL	0.038835
	CO2 captured	-0.075	-0.075								Impact Category	Water consumption
	CO2 losses	0.00375	0.00375								Unit	l/MJ_PtL
	Construction + EOL										Jet A-1	0.0123204
	PtL+DAC plant construction and EOL	0.0036	0.0036	1.54903e-05	1.1e-06	9.375e-07					Difference [%]	10.7663
	TTW										Total	0.144965
	PtL combustion	0.149798	0.0714286	0.000178431	3.90184e-05	1.55749e-05					Direct (fuel production)	0.144965
											Indirect (energy sources)	0
											Extraction from air	0

## Sheet: 3.1. Layouts PV Charts
	Elecricity source: PV
	GWP & GWP+RFI
	Layout & Impact Category	HTFT, low-temp. DAC GWP-100	HTFT, high-temp. DAC GWP-100	LTFT, low-temp. DAC GWP-100	LTFT, high-temp. DAC GWP-100	HTFT, low-temp. DAC GWP-100+RFI	HTFT, high-temp. DAC GWP-100+RFI	LTFT, low-temp. DAC GWP-100+RFI	LTFT, high-temp. DAC GWP-100+RFI
	Unit	kgCO2eq/MJ_PtL	kgCO2eq/MJ_PtL	kgCO2eq/MJ_PtL	kgCO2eq/MJ_PtL	kgCO2eq/MJ_PtL	kgCO2eq/MJ_PtL	kgCO2eq/MJ_PtL	kgCO2eq/MJ_PtL
	Jet A-1	0.0834676	0.0834676	0.0834676	0.0834676	0.162779	0.162779	0.162779	0.162779
	Difference [%]	-0.657259	-0.345518	-0.441091	-0.186118	-0.342807	-0.182957	-0.231963	-0.101222
	Total	0.0286078	0.054628	0.0466508	0.0679328	0.106977	0.132998	0.12502	0.146302
	WTT
	Operation
	PtL plant operation (electricity)	0.0233182	0.0233182	0.0366229	0.0366229	0.0233182	0.0233182	0.0366229	0.0366229
	DAC plant operation (electricity)	0.00151102	0	0.00624928	0	0.00151102	0	0.00624928	0
	DAC plant operation (NG)	0	0.0275313	0	0.0275313	0	0.0275313	0	0.0275313
	CO2 captured	-0.075	-0.075	-0.075	-0.075	-0.075	-0.075	-0.075	-0.075
	CO2 losses	0.00375	0.00375	0.00375	0.00375	0.00375	0.00375	0.00375	0.00375
	Construction + EOL
	PtL+DAC plant construction and EOL	0.0036	0.0036	0.0036	0.0036	0.0036	0.0036	0.0036	0.0036
	TTW
	PtL combustion	0.0714286	0.0714286	0.0714286	0.0714286	0.149798	0.149798	0.149798	0.149798
	AP
	Layout	HTFT, low-temp. DAC	HTFT, high-temp. DAC	LTFT, low-temp. DAC	LTFT, high-temp. DAC
	Unit	kgSO2eq/MJ_PtL	kgSO2eq/MJ_PtL	kgSO2eq/MJ_PtL	kgSO2eq/MJ_PtL
	Jet A-1	0.000225727	0.000225727	0.000225727	0.000225727
	Difference [%]	0.783067	0.824818	1.4545	1.31993
	Total	0.000402487	0.000411911	0.000554048	0.000523671
	WTT
	Operation
	PtL plant operation (electricity)	0.000195873	0.000195873	0.000307633	0.000307633
	DAC plant operation (electricity)	1.26926e-05	0	5.24939e-05	0
	DAC plant operation (NG)	0	2.21168e-05	0	2.21168e-05
	CO2 captured
	CO2 losses
	Construction + EOL
	PtL+DAC plant construction and EOL	1.54903e-05	1.54903e-05	1.54903e-05	1.54903e-05
	TTW
	PtL combustion	0.000178431	0.000178431	0.000178431	0.000178431
	EP
	Layout	HTFT, low-temp. DAC	HTFT, high-temp. DAC	LTFT, low-temp. DAC	LTFT, high-temp. DAC
	Unit	kg PO4 eq/MJ_PtL	kg PO4 eq/MJ_PtL	kg PO4 eq/MJ_PtL	kg PO4 eq/MJ_PtL
	Jet A-1	4.63619e-05	4.63619e-05	4.63619e-05	4.63619e-05
	Difference [%]	0.304486	0.343083	0.623612	0.578403
	Total	6.04784e-05	6.22678e-05	7.52737e-05	7.31777e-05
	WTT
	Operation
	PtL plant operation (electricity)	1.91209e-05	1.91209e-05	3.00308e-05	3.00308e-05
	DAC plant operation (electricity)	1.23904e-06	0	5.12441e-06	0
	DAC plant operation (NG)	0	3.02844e-06	0	3.02844e-06
	CO2 captured
	CO2 losses
	Construction + EOL
	PtL+DAC plant construction and EOL	1.1e-06	1.1e-06	1.1e-06	1.1e-06
	TTW
	PtL combustion	3.90184e-05	3.90184e-05	3.90184e-05	3.90184e-05
	POCP
	Layout	HTFT, low-temp. DAC	HTFT, high-temp. DAC	LTFT, low-temp. DAC	LTFT, high-temp. DAC
	Unit	kg_C2H4eq/MJ_PtL	kg_C2H4eq/MJ_PtL	kg_C2H4eq/MJ_PtL	kg_C2H4eq/MJ_PtL
	Jet A-1	2.39089e-05	2.39089e-05	2.39089e-05	2.39089e-05
	Difference [%]	0.230657	0.658396	0.623079	0.947765
	Total	2.94236e-05	3.96504e-05	3.8806e-05	4.65689e-05
	WTT
	Operation
	PtL plant operation (electricity)	1.21255e-05	1.21255e-05	1.90439e-05	1.90439e-05
	DAC plant operation (electricity)	7.8573e-07	0	3.24962e-06	0
	DAC plant operation (NG)	0	1.10125e-05	0	1.10125e-05
	CO2 captured
	CO2 losses
	Construction + EOL
	PtL+DAC plant construction and EOL	9.375e-07	9.375e-07	9.375e-07	9.375e-07
	TTW
	PtL combustion	1.55749e-05	1.55749e-05	1.55749e-05	1.55749e-05
	Non-renewable primary energy
	Layout	HTFT, low-temp. DAC	HTFT, high-temp. DAC	LTFT, low-temp. DAC	LTFT, high-temp. DAC
	Unit	MJ/MJ_PtL	MJ/MJ_PtL	MJ/MJ_PtL	MJ/MJ_PtL
	Jet A-1	1.18059	1.18059	1.18059	1.18059
	Difference [%]	-0.779176	-0.174967	-0.64261	-0.0742649
	Total	0.260703	0.974026	0.421932	1.09291
	Operation
	PtL+DAC plant operation (electricity)	0.221868	0.208366	0.383097	0.327255
	DAC plant operation (NG)	0	0.726825	0	0.726825
	Construction
	PtL+DAC plant construction and EOL	0.038835	0.038835	0.038835	0.038835
	Land transformation
	Layout	HTFT, low-temp. DAC	HTFT, high-temp. DAC	LTFT, low-temp. DAC	LTFT, high-temp. DAC
	Unit	MJ/MJ_PtL	MJ/MJ_PtL	MJ/MJ_PtL	MJ/MJ_PtL
	Jet A-1	0.000736667	0.000736667	0.000736667	0.000736667
	Difference [%]	3.51658	3.28752	6.7981	5.70729
	Total	0.00332722	0.00315848	0.0057446	0.00494104
	Direct: ptl plant infrastructure	2.41875e-07	2.41875e-07	2.41875e-07	2.41875e-07
	Direct: DAC plant infrastructure	3.75e-07	3.75e-07	3.75e-07	3.75e-07
	Direct: power plants infrastructure	0.00104538	0.000842933	0.00346277	0.00262549
	Indirect: power plants production and EOL	0.00228122	0.00231493	0.00228122	0.00231493
	Water consumption
	Layout	HTFT, low-temp. DAC	HTFT, high-temp. DAC	LTFT, low-temp. DAC	LTFT, high-temp. DAC
	Unit	l/MJ_PtL	l/MJ_PtL	l/MJ_PtL	l/MJ_PtL
	Jet A-1	0.0123204	0.0123204	0.0123204	0.0123204
	Difference [%]	-2.50848	3.57899	4.67883	10.7663
	Total	-0.0185851	0.0564149	0.0699654	0.144965
	Direct (fuel production)	0.0564149	0.0564149	0.144965	0.144965
	Indirect (energy sources)	0	0	0	0
	Extraction from air (DAC)	-0.075	0	-0.075	0
